# Supplementary material
Source: Research Square preprint supplement (doi:10.21203/rs.3.rs-9986169/v1)
Supplement: Supplementary file 1 [file 7c3fc1b78bb77d62bad888b4.pdf]

# Supplementary Information for “Learned variable-support priors accelerate symbolic regression of physical laws”

Chenxi He<sup>\*1</sup> and Jingqiu Chen<sup>2</sup>

<sup>1</sup>Cavendish Laboratory, University of Cambridge, Cambridge CB3 0HE, United Kingdom

<sup>2</sup>College of Physics and Optoelectronic Engineering, Shenzhen University, Shenzhen 518060, China

This Supplementary Information contains: (i) a selector-summary table that compares DenoisedSR with five classical feature selectors across AI-Feynman, SRSD-Feynman and noise levels (Supplementary Table S1); (ii) a threshold-sensitivity table demonstrating that the deployed  $\tau = 0.10$  operating point is not cherry-picked (Supplementary Table S2); (iii) an internal-validation table reporting two additional, internally-curated suites under a different evaluation protocol (Supplementary Table S3); (iv) a backend integration summary (Supplementary Table S6); (v) the master backend  $\times$  benchmark matrix (Supplementary Table S7); (vi) an 80-equation Feynman scale-up (Supplementary Table S8); (vii) controlled variable-name ablations (Supplementary Tables S4 and S5); and (viii) the SRSD-Feynman per-task precision diagnostic (Supplementary Fig. S1). All numbers reproduce from the released evaluation scripts at <https://github.com/ChenxiHeCam/DenoisedSR> (archived at [10.5281/zenodo.20584889](https://zenodo.org/record/20584889)).

**Supplementary Table S1. Summary of variable-support recovery across selectors and suites.** Variable-support recall, with the fraction of tasks on which the selector attains *perfect* recall (every true variable retained). All selectors except DenoisedSR are run at an oracle top- $k$  budget that hands them the true variable count for free. Recall on AI-Feynman is also reported under relative Gaussian label noise  $\eta$ ; entries marked — were not part of the noise sweep.

| Selector                        | AI-Feynman (118) |              | SRSD (120)   | AI-Feynman recall under noise $\eta$ |              |              |              |              |
|---------------------------------|------------------|--------------|--------------|--------------------------------------|--------------|--------------|--------------|--------------|
|                                 | recall           | perfect %    | recall       | 0.01                                 | 0.05         | 0.10         | 0.20         | 0.30         |
| Pearson $ \rho $                | 0.768            | 45.8         | —            | 0.772                                | 0.769        | 0.771        | 0.763        | 0.768        |
| Spearman $ \rho $               | 0.776            | 45.8         | —            | 0.773                                | 0.770        | 0.770        | 0.757        | 0.754        |
| mutual information              | 0.634            | 20.3         | —            | 0.633                                | 0.636        | 0.644        | 0.608        | 0.605        |
| random-forest importance        | 0.812            | 44.9         | —            | 0.815                                | 0.822        | 0.815        | 0.807        | 0.799        |
| Lasso (CV) <i>oracle k</i>      | 0.905            | 71.2         | 0.723        | 0.904                                | 0.904        | 0.886        | 0.881        | 0.868        |
| DenoisedSR (ours, $\tau=0.10$ ) | <b>1.000</b>     | <b>100.0</b> | <b>0.967</b> | <b>1.000</b>                         | <b>1.000</b> | <b>1.000</b> | <b>1.000</b> | <b>1.000</b> |

## References

\*Corresponding author: [ch2067@cam.ac.uk](mailto:ch2067@cam.ac.uk)

**Supplementary Table S2. Threshold sensitivity of the deployed RF+GAT ensemble.** Sweep of  $\tau$  on AI-Feynman (118 laws,  $q = 100, 20$  distractors). Recall remains 1.000 with 100% perfect-recall over  $\tau \in [0.05, 0.30]$  (a sixfold range); only at  $\tau \geq 0.50$  does recall start to decline. The deployed  $\tau = 0.10$  is not cherry-picked.

| $\tau$                 | Recall       | Precision    | Perfect-recall (%) | Mean kept columns |
|------------------------|--------------|--------------|--------------------|-------------------|
| 0.05                   | 1.000        | 0.705        | 100.0              | 9.03              |
| 0.08                   | 1.000        | 0.740        | 100.0              | 8.81              |
| <b>0.10 (deployed)</b> | <b>1.000</b> | <b>0.749</b> | <b>100.0</b>       | <b>8.76</b>       |
| 0.15                   | 1.000        | 0.766        | 100.0              | 8.67              |
| 0.20                   | 1.000        | 0.769        | 100.0              | 8.66              |
| 0.30                   | 1.000        | 0.780        | 100.0              | 8.60              |
| 0.50                   | 0.998        | 0.873        | 99.2               | 6.31              |
| 0.75                   | 0.981        | 0.991        | 93.2               | 3.87              |
| 1.00                   | 0.959        | 1.000        | 86.4               | 3.72              |

**Supplementary Table S3. Internal validation under a different protocol (not directly comparable to the four external benchmarks of Fig. ??).** Evaluated on internally-curated physical-law records drawn from the same knowledge graph as the training pool, using each record’s pre-sampled observation values rather than freshly sampled tables, and without random distractor padding. We report it as a separate scale check rather than a fifth external suite.

| Set                                     | Equations | Recall | Perfect-recall (%) |
|-----------------------------------------|-----------|--------|--------------------|
| Internal physics-law set (v5_physics65) | 1085      | 0.999  | 99.7               |
| Internal OOD-91 curated subset          | 91        | 0.996  | 98.9               |

**Supplementary Table S4. Variable filter is insensitive to physical names.** Same data, same model, same threshold  $\tau = 0.10$ ; only the variable names are changed between “named” (physical:  $m, v, q, \epsilon, \dots$ ) and “anonymized” ( $x_0, x_1, \dots$ ). Across 12 scenarios on AI-Feynman 118, the physical-name prior contributes at most 0.3 percentage points of variable filter rate. The deployed RF+GAT ensemble is dominated by the random-forest column-statistics head; the graph-attention head’s co-occurrence-graph contribution is largely vestigial for the variable task.

| Scenario                 | Named (physical) |         | Anonymized ( $x_i$ ) |         | $\Delta$ (named–anon) |             |
|--------------------------|------------------|---------|----------------------|---------|-----------------------|-------------|
|                          | recall           | filter% | recall               | filter% | recall                | filter (pp) |
| baseline $q=100, d=20$   | 1.000            | 98.4    | 0.998                | 98.3    | +0.002                | +0.04       |
| small $q=50$             | 1.000            | 97.0    | 0.998                | 97.0    | +0.002                | +0.04       |
| very small $q=20$        | 1.000            | 90.8    | 0.998                | 90.6    | +0.002                | +0.18       |
| noise $\eta = 0.30$      | 1.000            | 98.7    | 0.998                | 98.6    | +0.002                | +0.08       |
| noise $\eta = 0.50$      | 1.000            | 98.6    | 0.998                | 98.5    | +0.002                | +0.10       |
| noise $\eta = 1.00$      | 1.000            | 98.6    | 0.998                | 98.6    | +0.002                | +0.07       |
| many distractors $d=50$  | 1.000            | 98.5    | 0.998                | 98.5    | +0.002                | +0.04       |
| many distractors $d=100$ | 1.000            | 98.6    | 0.998                | 98.5    | +0.002                | +0.09       |
| hard $q=20, \eta = 0.50$ | 1.000            | 90.9    | 0.998                | 90.7    | +0.002                | +0.27       |

**Supplementary Table S5. Operator filter is sensitive to physical names.** Same data, same operator predictor, varying threshold  $\tau_{\text{op}}$ . Operator filter rate is the fraction of the 13 non-trivial operators (excluding the four always-on arithmetic operators) dropped from the search library. Physical names contribute +7 to +17 percentage points of operator recall—a much larger effect than for variables, because the operator-vs-data signal in  $(\mathbf{x}, y)$  is weak and the physics-knowledge-graph prior is the main source of information.

| $\tau_{\text{op}}$     | Named (physical) |              |             | Anonymized ( $x_i$ ) |              |             | $\Delta$ recall<br>(named–anon) |
|------------------------|------------------|--------------|-------------|----------------------|--------------|-------------|---------------------------------|
|                        | recall           | prec.        | filter%     | recall               | prec.        | filter%     |                                 |
| 0.03                   | 0.912            | 0.383        | 58.9        | 0.744                | 0.346        | 59.8        | +0.168                          |
| 0.10                   | 0.825            | 0.465        | 67.9        | 0.726                | 0.380        | 65.6        | +0.099                          |
| 0.20                   | 0.761            | 0.503        | 72.9        | 0.703                | 0.427        | 70.1        | +0.058                          |
| <b>0.30 (deployed)</b> | <b>0.738</b>     | <b>0.536</b> | <b>76.5</b> | <b>0.667</b>         | <b>0.437</b> | <b>72.9</b> | +0.071                          |
| 0.50                   | 0.597            | 0.547        | 82.7        | 0.521                | 0.420        | 82.2        | +0.076                          |
| 0.70                   | 0.407            | 0.532        | 88.9        | 0.285                | 0.376        | 90.4        | +0.122                          |

**Supplementary Table S6. Backend integration summary.** Mean exact-law recovery and mean held-out  $R^2$  on the 30-equation Feynman headline subset ( $n_{\text{dist}} = 20$ ,  $q = 100$ ). Errors are  $\pm$ s.d. over three random seeds. The variable prior shrinks the candidate-column set from 23.2 to 3.4 in both backends.

| Condition                                                                     | Exact recovery (%) | Mean held-out $R^2$ |
|-------------------------------------------------------------------------------|--------------------|---------------------|
| <i>PySR (10 s budget, full 17-op library)</i>                                 |                    |                     |
| full search                                                                   | 42.2 $\pm$ 13.5    | 0.906 $\pm$ 0.045   |
| + DenoisedSR variable prior                                                   | 60.0 $\pm$ 0.0     | 0.980 $\pm$ 0.011   |
| + DenoisedSR variable + operator prior                                        | 60.0 $\pm$ 11.5    | 0.979 $\pm$ 0.011   |
| <i>gplearn (20 generations, population 500, 10-op library)</i>                |                    |                     |
| full search                                                                   | 3.3 $\pm$ 3.3      | 0.475 $\pm$ 0.083   |
| + DenoisedSR variable prior                                                   | 17.8 $\pm$ 1.9     | 0.763 $\pm$ 0.029   |
| <i>PSE (parallel GPU enumeration, 30 s budget, 9-op library, single seed)</i> |                    |                     |
| full search                                                                   | 0                  | 0.184               |
| + DenoisedSR variable prior                                                   | 40                 | 0.895               |

**Supplementary Table S7. Master backend  $\times$  benchmark matrix.** Exact-law recovery (%) with held-out  $R^2 \geq 0.999$ ) on five physical-symbolic benchmarks for three structurally different SR backends, with and without the DenoisedSR variable prior. Cells show *full backend*  $\rightarrow$  *+DenoisedSR*; gap in percentage points. Multi-seed entries are mean $\pm$ s.d.; single-seed entries omit the standard deviation. PySR-Feynman118 is over three random seeds; gplearn entries on Feynman are over three seeds; remaining cells are single seed. PSE-SRSD is not evaluated because PSE’s float32 tensor representation underflows on SRSD’s  $\sim 10^{60}$ -magnitude physical-unit targets (a backend-data interaction, unrelated to the prior). Bold marks the larger of the two values in each row.

| Benchmark                | Distractors        | PySR                                                              | gplearn                                              | PSE                                                  |
|--------------------------|--------------------|-------------------------------------------------------------------|------------------------------------------------------|------------------------------------------------------|
|                          |                    | <i>full</i> $\rightarrow$ <i>+prior</i> ( $\Delta$ )              | <i>full</i> $\rightarrow$ <i>+prior</i> ( $\Delta$ ) | <i>full</i> $\rightarrow$ <i>+prior</i> ( $\Delta$ ) |
| AI-Feynman 118 (3 seeds) | 20 random          | 46.3 $\pm$ 3.0 $\rightarrow$ <b>57.3<math>\pm</math>1.8</b> (+11) | 0.8 $\rightarrow$ <b>11.0</b> (+10)                  | 8.5 $\rightarrow$ <b>42.4</b> (+34)                  |
| Strogatz 15              | 20 random          | 60.0 $\rightarrow$ <b>66.7</b> (+7)                               | 0.0 $\rightarrow$ 0.0 (0)                            | 6.7 $\rightarrow$ <b>53.3</b> (+47)                  |
| Nguyen 12                | 20 random          | <b>91.7</b> $\rightarrow$ <b>91.7</b> (0)                         | 8.3 $\rightarrow$ 8.3 (0)                            | 33.3 $\rightarrow$ <b>100.0</b> (+67)                |
| SRSD-Feynman 120         | $\sim$ 2 plausible | <b>54.2</b> $\rightarrow$ 50.0 (−4)                               | 30.0 $\rightarrow$ 30.0 (0)                          | —                                                    |
| SRSD-Feynman 120         | + 20 random        | 42.5 $\rightarrow$ <b>54.2</b> (+12)                              | 25.0 $\rightarrow$ <b>29.2</b> (+4)                  | —                                                    |

**Supplementary Table S8. Headline result scales to 80 Feynman equations.** Repeating the PySR comparison at the same configuration ( $n_{\text{dist}} = 20$ ,  $q = 100$ ,  $\tau = 0.10$ , single seed) on the first 80 Feynman tasks (chosen by  $2 \leq |\text{features}| \leq 9$ ) rather than the headline 30. The gain is preserved at larger scale; full PySR’s higher absolute rate at this scale (54% vs. 30–57% across seeds at  $n=30$ ) is consistent with the 30-equation subset including a higher fraction of harder formulas.

| Condition                              | Exact (%) | Mean held-out $R^2$ | Variable recall |
|----------------------------------------|-----------|---------------------|-----------------|
| full PySR (all 23 cols, 17 ops)        | 54        | 0.900               | —               |
| + DenoisedSR variable prior (3.4 cols) | 66        | 0.981               | 1.000           |
| + DenoisedSR variable + operator prior | 68        | 0.981               | 1.000           |

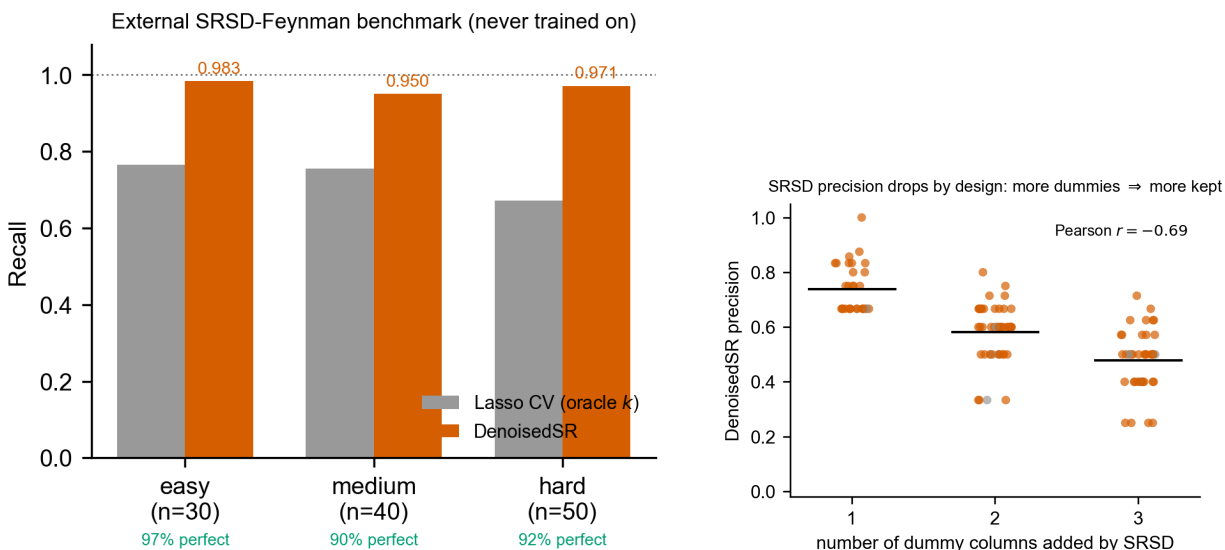

**Supplementary Fig. S1. Detail on SRSD-Feynman.** *Left:* recall on each SRSD difficulty split (30 easy, 40 medium, 50 hard) for DenoisedSR vs. Lasso at oracle top- $k$ ; DenoisedSR exceeds 0.95 recall on every split. *Right:* diagnostic of the apparent precision drop on SRSD (0.59 overall). Each marker is one of the 120 SRSD tasks (orange = perfect recall, grey = imperfect recall); horizontal bars show the binned mean precision. Precision falls monotonically with the number of dummy columns SRSD adds to the task (Pearson  $r = -0.69$ ) because the front-end at  $\tau=0.10$  retains physically plausible dummies rather than discarding them; on tasks with no dummies our precision is near 1.
